# Supplementary material for: Dual Effects of Cold Storage and Stored Host Eggs of Spodoptera frugiperda (Smith) (Lepidoptera: Noctuidae) on the Reproductive Capacity of Telenomus remus Nixon (Hymenoptera: Scelionidae)
Source: MDPI journal article supplement (doi:10.3390/insects15040233), 2024-03-28
Supplement: s1 [file s1]

## Supplementary information

Ranran Qiu <sup>1,2</sup>, Jun Li <sup>1,\*</sup>, Nicolas Desneux <sup>3</sup>, Liansheng Zang <sup>4</sup>, Xiaofang He <sup>2</sup> and Xin Lü <sup>1,\*</sup>

<sup>1</sup> Guangdong Key Laboratory of Animal Conservation and Resource Utilization, Guangdong Public Laboratory of Wild Animal Conservation and Utilization, Institute of Zoology, Guangdong Academy of Sciences, 105 Xingang Road West, Guangzhou 510260, China

<sup>2</sup> College of Plant Protection, South China Agricultural University, Guangzhou 510642, China;

<sup>3</sup> Université Côte d'Azur, INRAE, CNRS, UMR ISA, 06000 Nice, France

<sup>4</sup> National Key Laboratory of Green Pesticide, Key Laboratory of Green Pesticide and Agricultural Bioengineering, Ministry of Education, Guizhou University, Guiyang 550025, China

\* Correspondence: junl@giabr.gd.cn (J.L.); greenhopelv@163.com (X.L.)

**Table S1.** Multivariate ANOVA of effects of three cold storage factors on reproductive parameters of *Telenomus remus* parasitising fresh FAW eggs.

| Biological parameters     | Factors | df | F      | P      |
|---------------------------|---------|----|--------|--------|
| Emergence rate (%)        | A       | 3  | 48.47  | <0.001 |
|                           | B       | 3  | 335.71 | <0.001 |
|                           | C       | 3  | 101.53 | <0.001 |
|                           | A*B     | 9  | 13.62  | <0.001 |
|                           | A*C     | 9  | 1.76   | <0.001 |
|                           | B*C     | 9  | 13.88  | <0.001 |
|                           | A*B*C   | 27 | 4.04   | <0.001 |
| Number of adults produced | A       | 3  | 43.51  | <0.001 |
|                           | B       | 3  | 366.93 | <0.001 |
|                           | C       | 3  | 109.14 | <0.001 |
|                           | A*B     | 9  | 7.5    | <0.001 |
|                           | A*C     | 9  | 5.00   | <0.001 |
|                           | B*C     | 9  | 24.9   | <0.001 |
|                           | A*B*C   | 27 | 6.00   | <0.001 |
| Female proportion (%)     | A       | 3  | 1.38   | 0.253  |
|                           | B       | 3  | 81.78  | <0.001 |
|                           | C       | 3  | 16.76  | <0.001 |
|                           | A*B     | 9  | 2.36   | 0.017  |
|                           | A*C     | 9  | 1.62   | 0.117  |
|                           | B*C     | 9  | 16.06  | <0.001 |
|                           | A*B*C   | 27 | 3.62   | <0.001 |

\*A, developmental stage; B, storage duration; C, storage temperature

**Table S2.** Multivariate ANOVA of effects of two cold storage factors on hatching rate of *Spodoptera frugiperda*.

| Biological parameters     | Factors | df | <i>F</i> | <i>P</i> |
|---------------------------|---------|----|----------|----------|
| FAW egg hatching rate (%) | A       | 3  | 21.70    | <0.001   |
|                           | B       | 3  | 32.24    | <0.001   |
|                           | A*B     | 9  | 4.22     | <0.001   |

\*A, storage duration; B, storage temperature

**Table S3.** Multivariate ANOVA of effects of two cold storage factors on reproductive parameters of *Telenomus remus* parasitizing stored FAW eggs.

| Biological parameters     | Factors | df | <i>F</i> | <i>P</i> |
|---------------------------|---------|----|----------|----------|
| Emergence rate (%)        | A       | 3  | 21.11    | <0.001   |
|                           | B       | 3  | 19.39    | <0.001   |
|                           | A*B     | 9  | 2.55     | 0.007    |
| Number of adults produced | A       | 3  | 33.30    | <0.001   |
|                           | B       | 3  | 25.01    | <0.001   |
|                           | A*B     | 9  | 2.77     | 0.004    |
| Female proportion (%)     | A       | 3  | 28.16    | <0.001   |
|                           | B       | 3  | 8.47     | <0.001   |
|                           | A*B     | 9  | 3.96     | 0.017    |

\*A, storage duration; B, storage temperature
